# Supplementary material for: The Antigenicity of Epidemic SARS-CoV-2 Variants in the United Kingdom
Source: PubMed Central journal article supplement (PMC8247764; doi:10.3389/fimmu.2021.687869), 2021-06-17

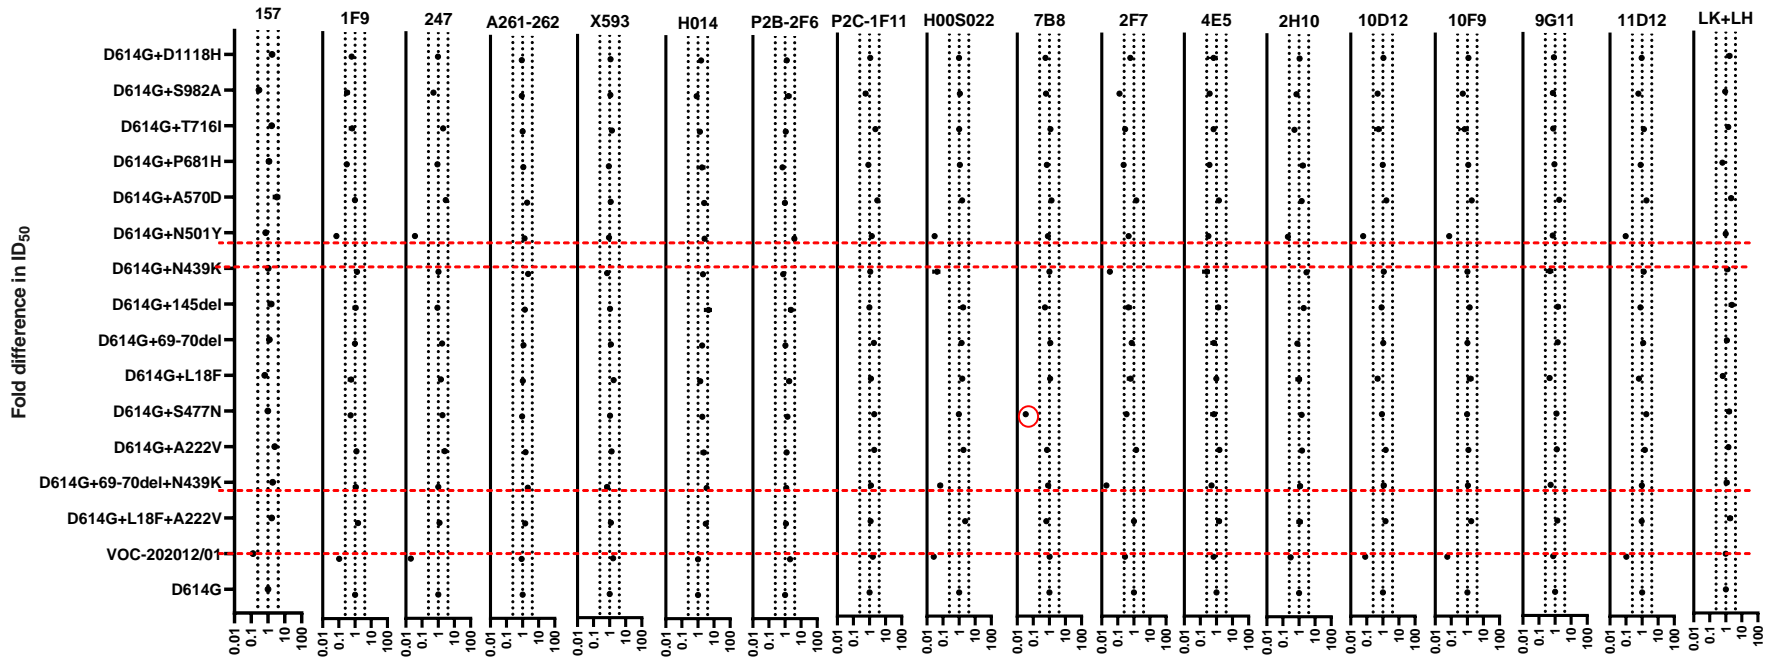

Supplement: Image_1.pdf [file Image_1.pdf]
