# Supplementary material for: The Antigenicity of Epidemic SARS-CoV-2 Variants in the United Kingdom
Source: PubMed Central journal article supplement (PMC8247764; doi:10.3389/fimmu.2021.687869), 2021-06-17
Supplement: Table_1.pdf [file Table_1.pdf]

| Site  | Mutant   | Forward Primer                                     |
|-------|----------|----------------------------------------------------|
| 18    | L18F     | GGTGAGCAGCCAGTGCGTGAATTTACCACCAGAACCCAGCTGCCTC     |
| 69-70 | 69-70del | CGTGACCTGGTTCCACGCCATCAGCGGCACCAATGGCACCAAGAGATTC  |
| 145   | 145del   | GACCCTTTCTGGGTGTTTATCATAAGAACAACAAGAGCTGGATGG      |
| 222   | A222V    | ACCTGCCTCAGGGCTTCAGCGTGCTGGAGCCTCTGGTGGACCTG       |
| 439   | N439K    | CTGCGTGATCGCGTGGAACCTAAGAACCTGGACTCGAAAGTTGGAGGC   |
| 477   | S477N    | GCACCGAGATCTACCAGGCCGGCAACACACCGTGTAATGGCGTGGAGGGC |
| 501   | N501Y    | AGAGCTACGGCTTCCAGCCTACCTACGGCGTGGGCTACCAGCCTTACAG  |
| 570   | A570D    | CAACAATTCGGCAGAGACATCGACGACACCACAGATGCTGTAAGAGAC   |
| 614   | D614G    | GTGGCCGTGCTGTACCAGGGCGTGAATTGCACCGAGGT             |
| 681   | P681H    | CTACCAGACCCAGACCAATAGCCACAGAAGAGCCAGAAGCGTGGCCAGCC |
| 716   | T716I    | CAATAATAGCATCGCCATCCCTATCAATTTACCATCAGCGTGACCAC    |
| 982   | S982A    | TACTCAACGACATCCTGGCGAGACTGGACAAGGTGGAGGCCGA        |
| 1118  | D1118H   | ACGAGCCTCAGATCATCACCACCCACAATACCTTCGTGAGCGGCAA     |
